# Supplementary material for: Incorporation of the dopamine D2L receptor and bacteriorhodopsin within bicontinuous cubic lipid phases. 2. Relevance to in meso crystallization of integral membrane proteins in novel lipid systems
Source: Royal Society of Chemistry journal article supplement (doi:10.1039/c0sm00464b), 2010-01-01
Supplement: c0sm00464b.pdf [file c0sm00464b.pdf]

**Supporting Information for “Incorporation of the Dopamine D2L receptor and bacteriorhodopsin within bicontinuous cubic lipid phases. 2. Relevance to *in meso* crystallization of integral membrane proteins in novel lipid systems”**

**(1) Representative 1-D diffraction plots**

In all images the {hkl} reflections corresponding to the particular lipid mesophase adopted are highlighted. Peaks corresponding to a  $Q_{II}^D$  cubic phase are indicated in normal type, peaks corresponding to a  $Q_{II}^G$  cubic phase in bold type and peaks corresponding to a  $H_{II}$  phase in italic type. For some plots the intensity has been plotted on a logarithmic scale to visualize less intense peaks.

**Incorporation of dopamine D2L receptor within FE**

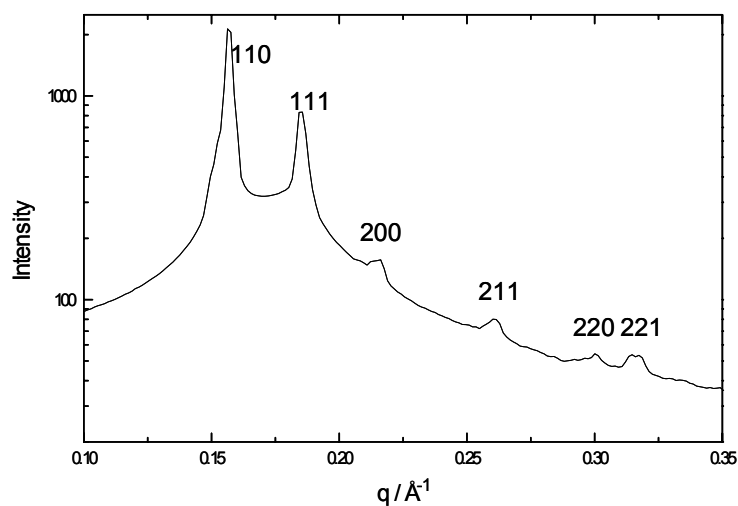

**Figure S1.** 1D diffraction pattern for FE 40wt% D2L receptor buffer. T=20°C. Peaks corresponding to a  $Q_{II}^D$  phase are observed.

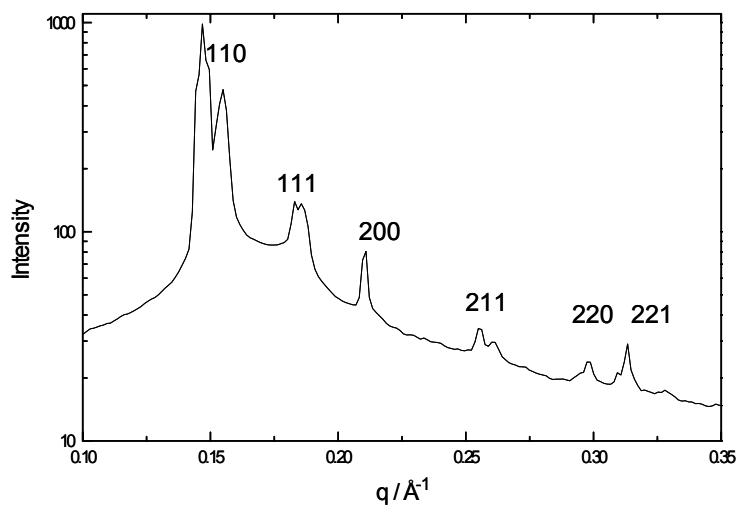

**Figure S2.** 1D diffraction pattern for FE 40wt% D2L receptor at 0.55 mg/ml.  $T=20^{\circ}\text{C}$ . Peaks corresponding to a  $Q_{II}^D$  phase are observed. The 2-D diffraction pattern is spotty resulting in split peaks.

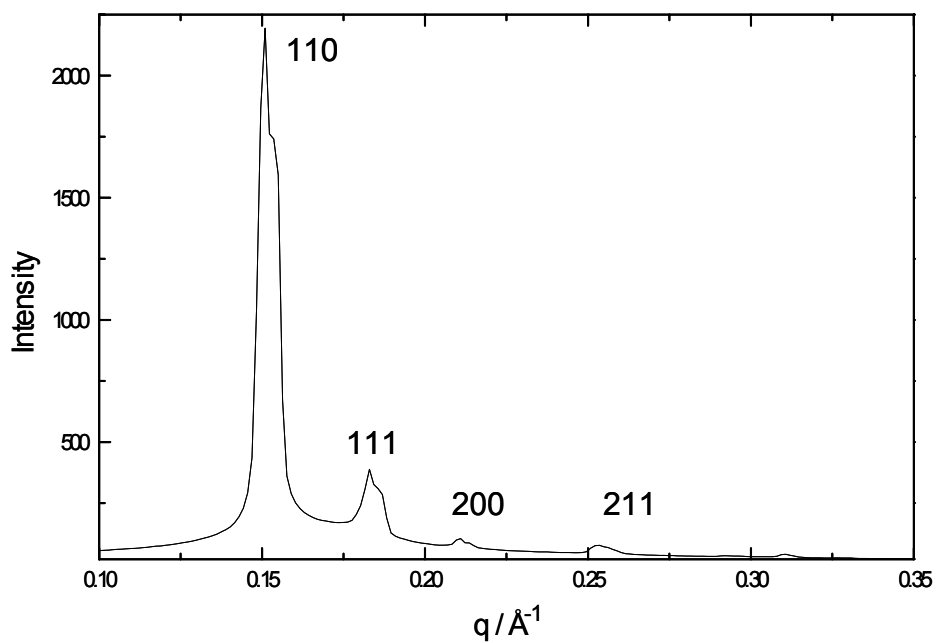

**Figure S3.** 1D diffraction pattern for FE 40wt% D2L receptor at 1.1 mgs/ml.  $T=20^{\circ}\text{C}$ . Peaks corresponding to a  $Q_{II}^D$  phase are observed. This corresponds to Fig. 4(A) but with intensity plotted on a linear axis.

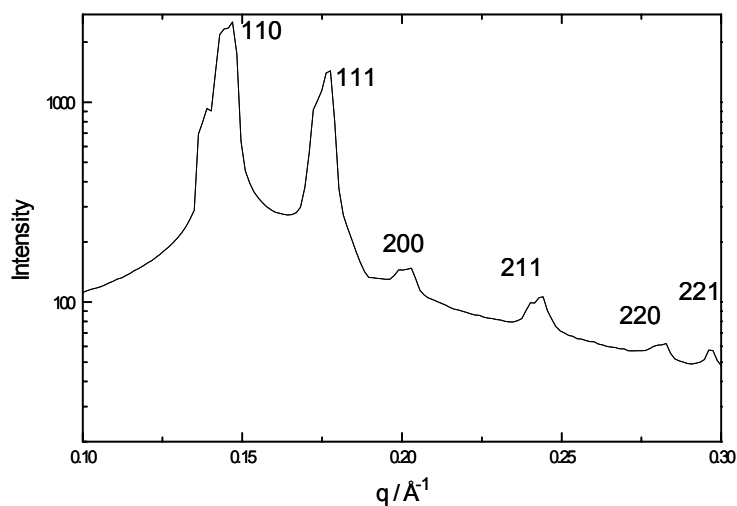

**Figure S4.** 1D diffraction pattern for AE 50wt% D2L receptor buffer.  $T=15^{\circ}\text{C}$ . Peaks corresponding to a  $Q_{II}^D$  phase are observed.

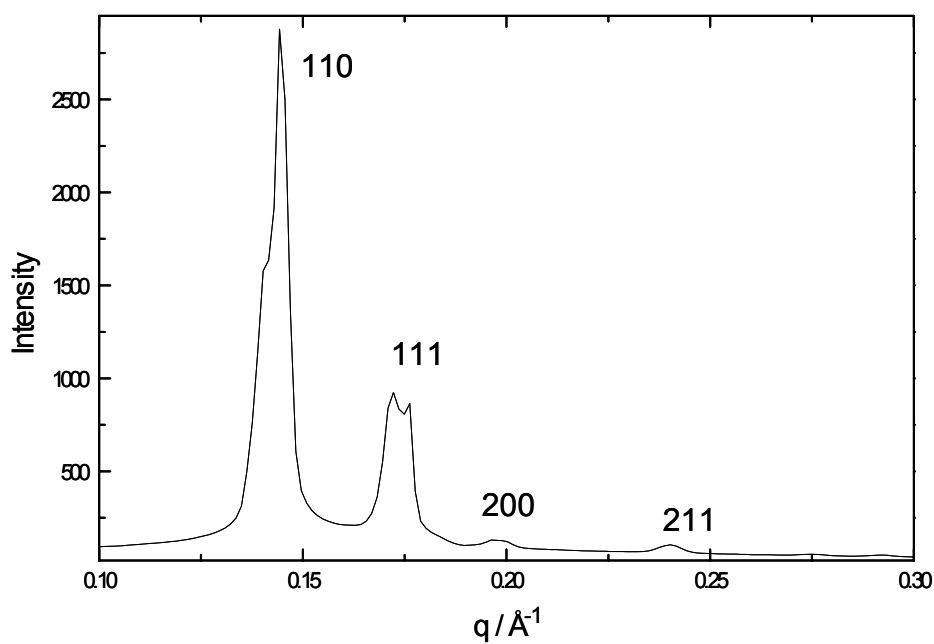

**Figure S5.** 1D diffraction pattern for AE 50wt% D2L receptor at 0.55 mgs/ml.  $T=15^{\circ}\text{C}$ . Peaks corresponding to a  $Q_{II}^D$  phase are observed. This corresponds to Fig. 4(B) but with intensity plotted on a linear axis.

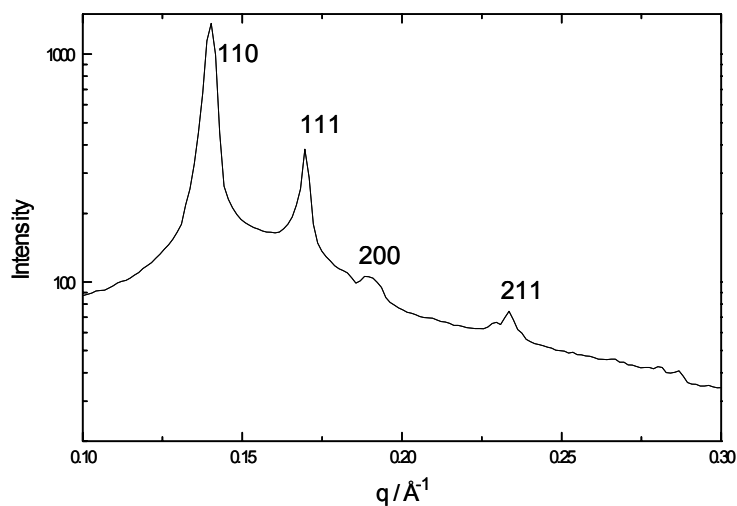

**Figure S6.** 1D diffraction pattern for AE 50wt% D2L receptor at 1.1 mgs/ml.  $T=15^{\circ}\text{C}$ . Peaks corresponding to a  $Q_{II}^D$  phase are observed.

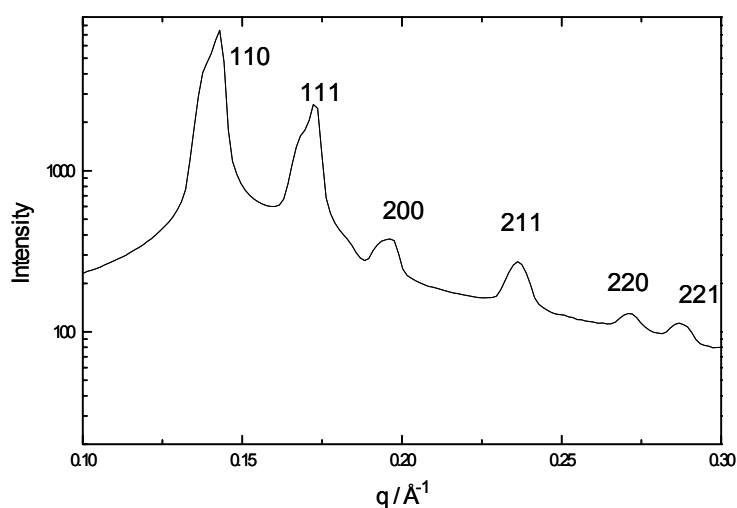

**Figure S7.** 1D diffraction pattern for AE 50wt% D2L receptor at 2.2 mgs/ml.  $T=15^{\circ}\text{C}$ . Peaks corresponding to a  $Q_{II}^D$  phase are observed.

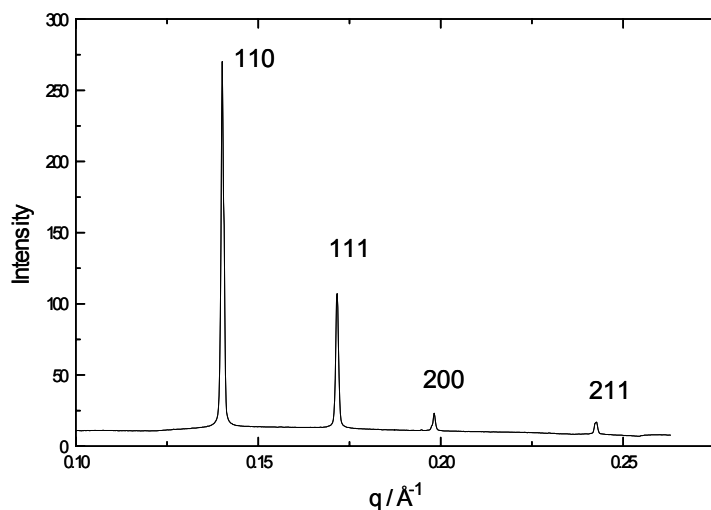

**Figure S8.** 1D diffraction pattern for FE 40wt% Na K phosphate buffer.  $T=20^{\circ}\text{C}$ .

Peaks corresponding to a  $Q_{II}^D$  phase are observed

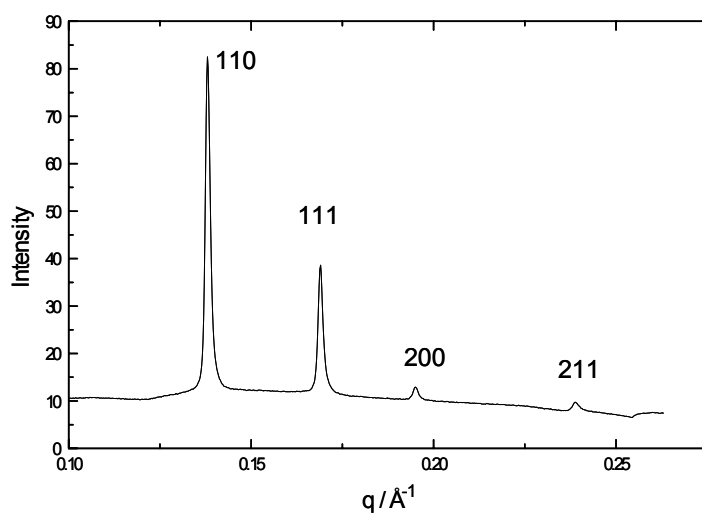

**Figure S9.** 1D diffraction pattern for FE 40wt% bR at 12 mgs/ml.  $T=20^{\circ}\text{C}$ . Peaks corresponding to a  $Q_{II}^D$  phase are observed.

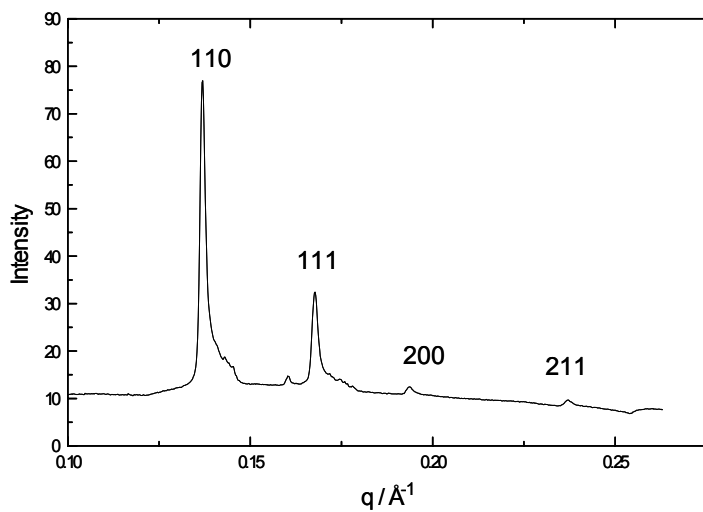

**Figure S10.** 1D diffraction pattern for FE 40wt% bR at 18 mgs/ml.  $T=20^{\circ}\text{C}$ . Peaks corresponding to a  $Q_{II}^D$  phase are observed. Some additional peaks indicate an element of disorder within the sample at this protein concentration.

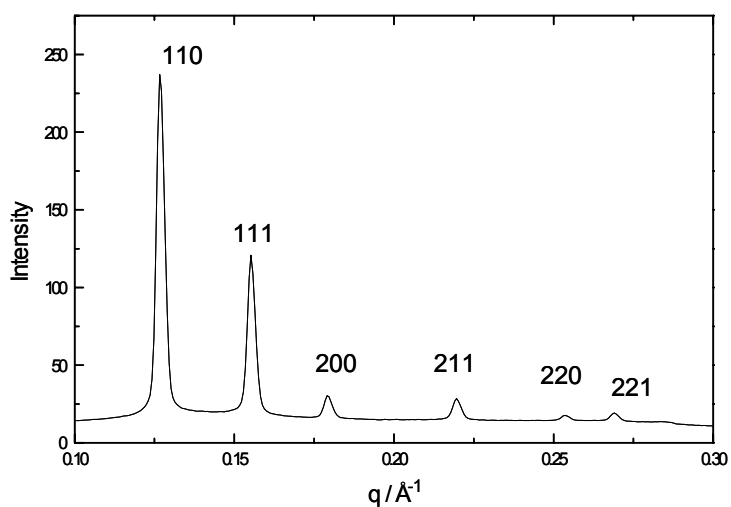

**Figure S11.** 1D diffraction pattern for AE 50wt% bR at 9 mgs/ml.  $T=9^{\circ}\text{C}$ . Peaks corresponding to a  $Q_{II}^D$  phase are observed.

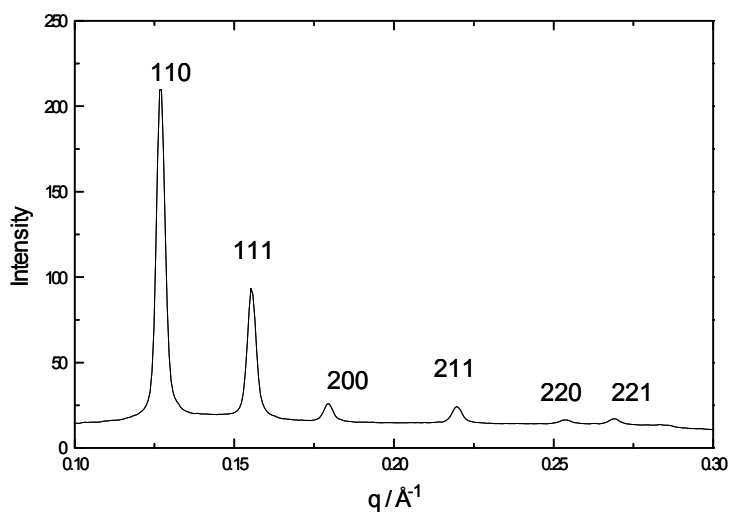

**Figure S12.** 1D diffraction pattern for AE 50wt% bR at 18 mgs/ml.  $T=9^{\circ}\text{C}$ . Peaks corresponding to a  $Q_{II}^D$  phase are observed.

## (2) Analysis of bilayer thickness and water channel radius

For a sample of known sample composition, lipid length,  $l$ , was calculated from the lattice parameter,  $a$ , by using Eq. 1<sup>18</sup>

$$\Phi_l = 2A_0 \left( \frac{l}{a} \right) + \frac{4\pi\chi}{3} \left( \frac{l}{a} \right)^3 \quad (1)$$

Where  $\Phi_l$  is the percentage of lipid by volume within the sample, and  $A_0$  and  $\chi$  are the dimensionless surface area and the Euler characteristic of the specific cubic phase [ $A_0 = 3.091$  ( $Q_{II}^G$ );  $1.919$  ( $Q_{II}^D$ ) and  $\chi = -8$  ( $Q_{II}^G$ ) and  $-2$  ( $Q_{II}^D$ )].

$\Phi_l$ , the percentage of lipid by volume within the sample, is calculated from the known sample composition,  $c$ , using Eq. 2<sup>19</sup> where  $\Phi_l = 1 - \Phi_w$ , the water density  $\rho_w = 1\text{g/cm}^3$  and the density of the lipid sample  $\rho_L$ .  $\rho_{AE} = 0.92\text{g/cm}^3$ .  $\rho_{FE}$  is not known but is assumed to be the same as phytantriol (Phy) which has a similar branched structure  $\rho(\text{Phy}) = 0.94\text{g/cm}^3$ .

$$\Phi_w = \frac{c}{c + (1-c) \frac{\rho_w}{\rho_L}} \quad (2)$$

The water channel radius,  $r_w$ , may then be calculated using Eq. 3.<sup>18</sup>

$$r_w = \sqrt{\frac{-A_0 a^2}{2\pi\chi}} - l \quad (3)$$
